# Supplementary material for: Review on Eco-Environment Research in the Yellow River Basin: A Bibliometric Perspective
Source: MDPI journal article supplement (doi:10.3390/ijerph191911986), 2022-09-22
Supplement: s1 [file s1]

## Supplementary Figures

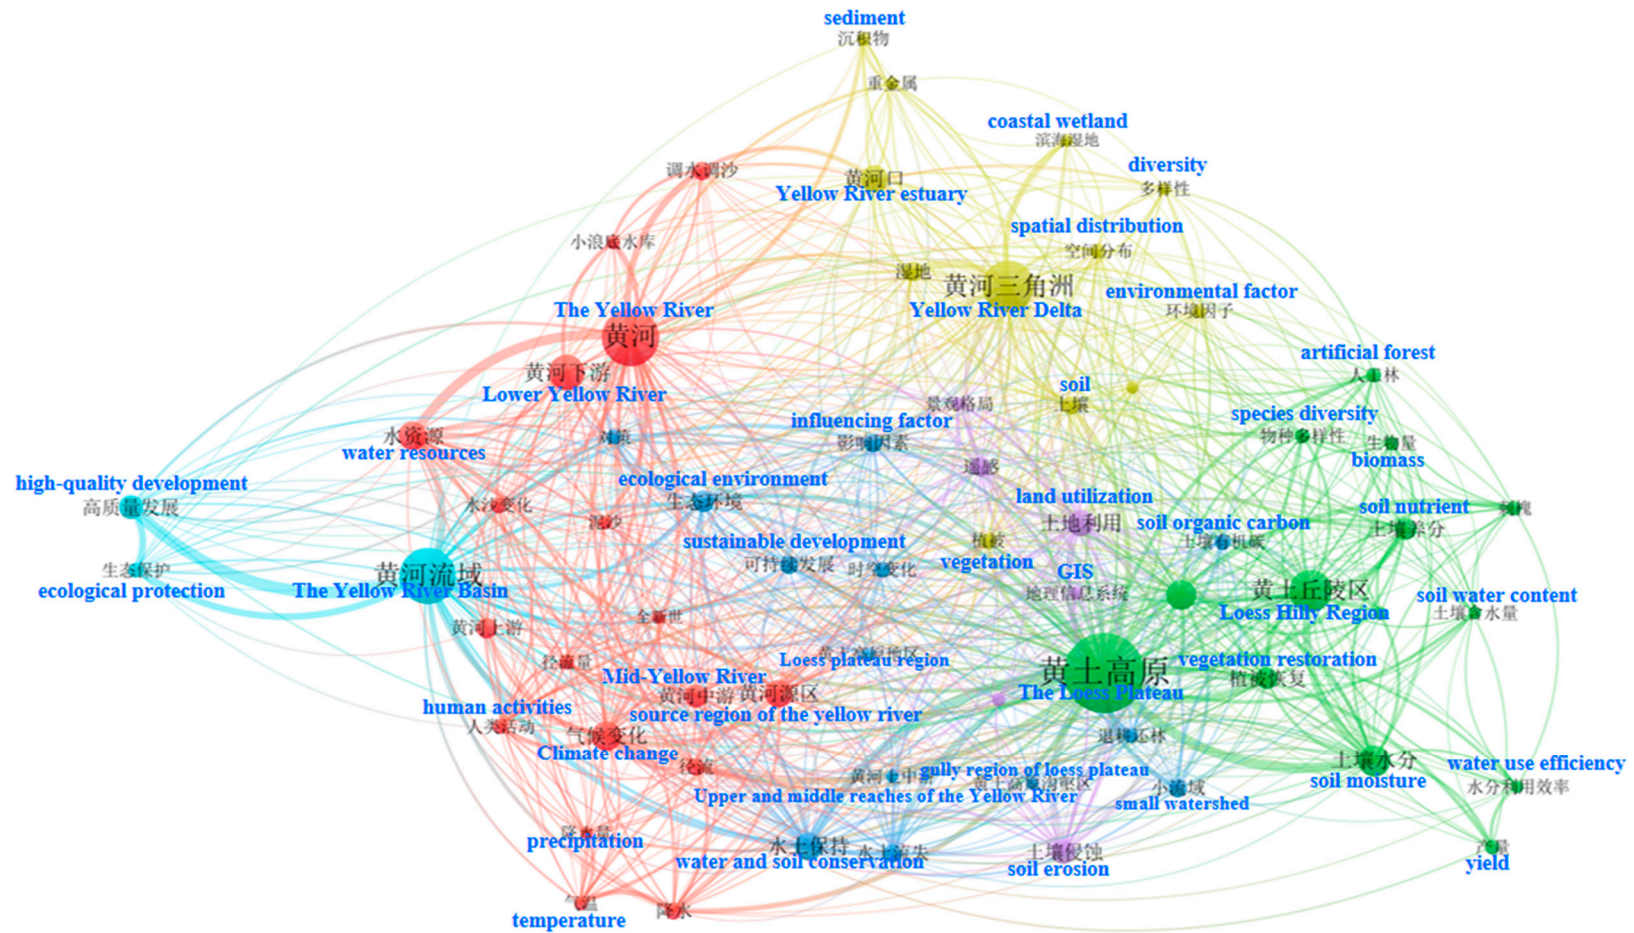

**Supplementary Figure S1. Keyword co-occurrence network map in the eco-environment research in YRB from CNKI (CSCD, CSSCI, and Core).**

(a) 1992—2000

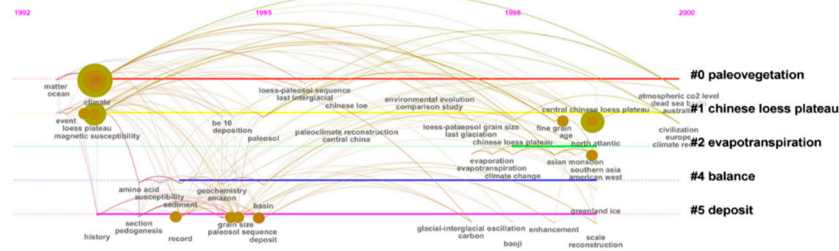

(b) 2001—2005

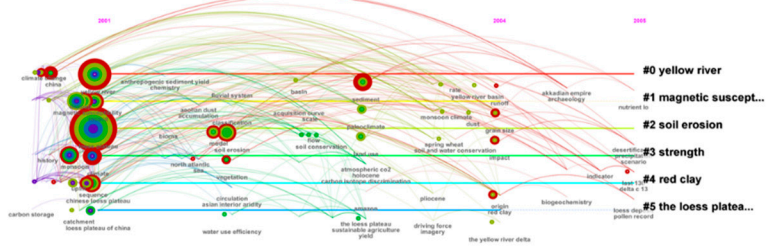

(c) 2006—2010

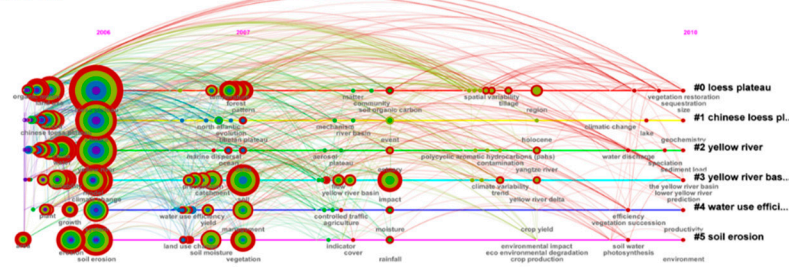

(d) 2011—2015

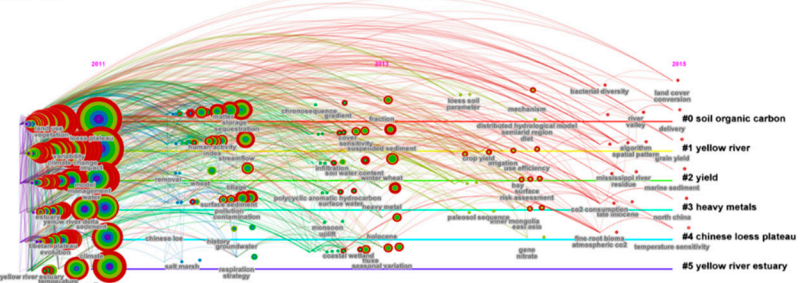

(e) 2016—2019

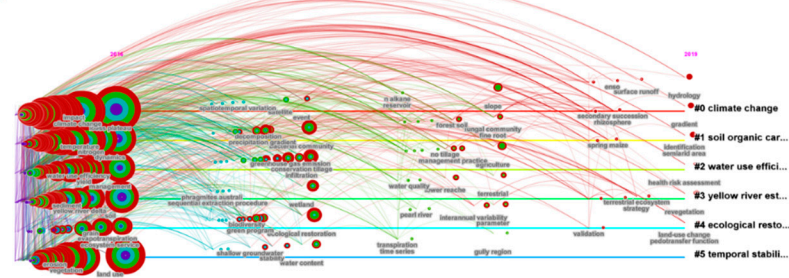

(f) 2020—2021

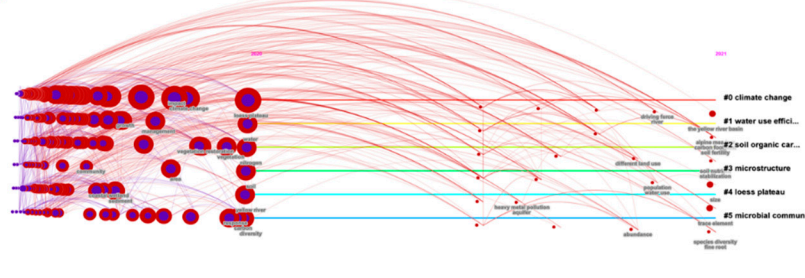

Supplementary Figure S2. Phased topic evolution map of papers in the eco-environment research in YRB from WoS platform.

(a) 1992—2000

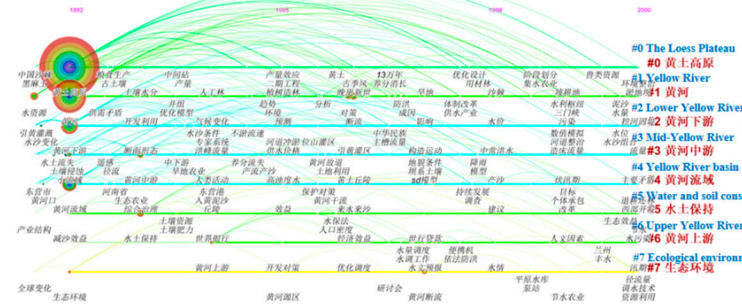

(b) 2001—2005

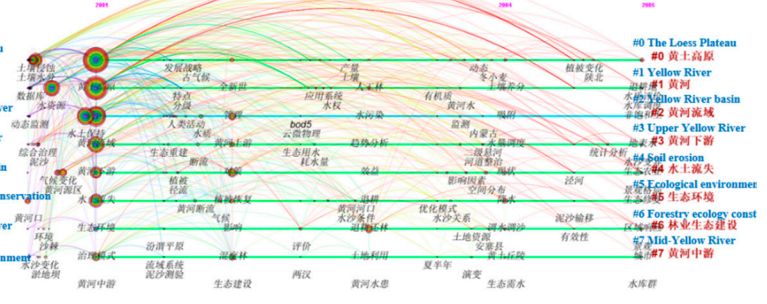

(c) 2006—2010

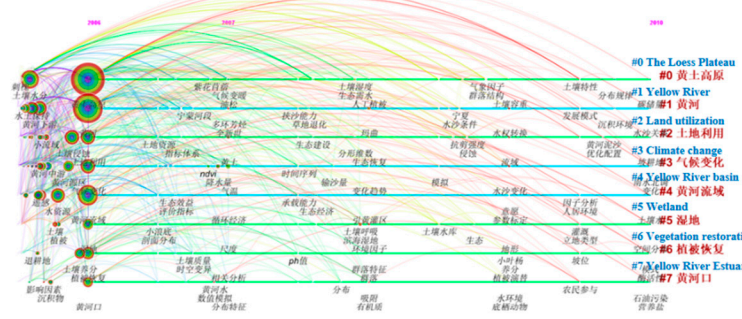

(d) 2011—2015

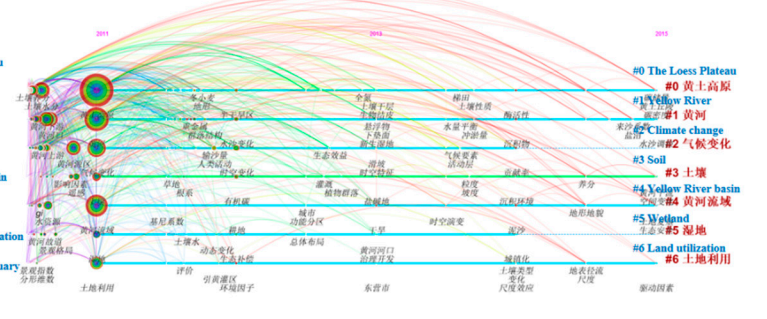

(e) 2016—2019

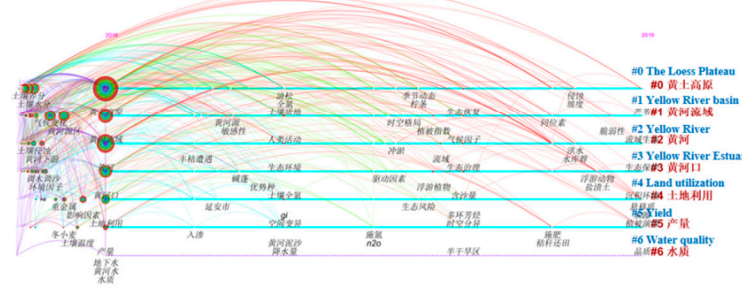

(f) 2020—2021

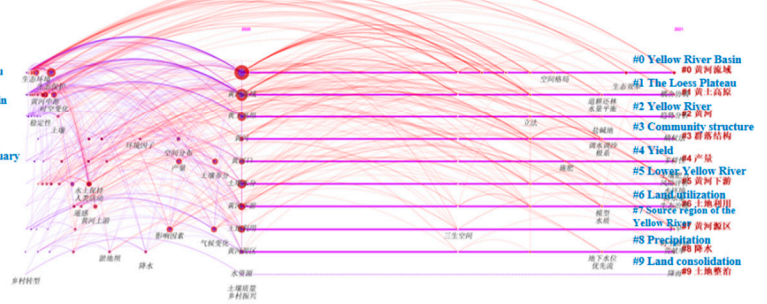

**Supplementary Figure S3. Phased topic evolution map of papers in the eco-environment research in YRB from CNKI (CSCD, CSSCI, and Core).**

## Supplementary Tables

**Supplementary Table S1. Highly cited scientific papers in the eco-environment research in the Yellow River Basin from WoS platform**

| NO. | Title                                                                                                                                                                           | First Author    | Journal               | Year | Times |
|-----|---------------------------------------------------------------------------------------------------------------------------------------------------------------------------------|-----------------|-----------------------|------|-------|
| 1   | Revegetation in China's Loess Plateau is approaching sustainable water resource limits                                                                                          | Feng, Xiaoming  | Nat. Clim. Chang.     | 2016 | 673   |
| 2   | Reduced sediment transport in the Yellow River due to anthropogenic changes                                                                                                     | Wang, Shuai     | Nat. Geosci.          | 2016 | 565   |
| 3   | Soil erosion, conservation, and eco-environment changes in the loess plateau of china                                                                                           | Zhao, Guangju   | Land Degrad. Dev.     | 2013 | 553   |
| 4   | A Policy-Driven Large Scale Ecological Restoration: Quantifying Ecosystem Services Changes in the Loess Plateau of China                                                        | Lu, Yihe        | PLoS One              | 2012 | 346   |
| 5   | Soil moisture decline due to afforestation across the Loess Plateau, China                                                                                                      | Jia, Xiaoxu     | J. Hydrol.            | 2017 | 264   |
| 6   | Quantifying the impacts of climate change and ecological restoration on streamflow changes based on a Budyko hydrological model in China's Loess Plateau                        | Liang, Wei      | Water Resour. Res.    | 2015 | 262   |
| 7   | Soil bacterial community dynamics reflect changes in plant community and soil properties during the secondary succession of abandoned farmland in the Loess Plateau             | Zhang, Chao     | Soil Biol. Biochem.   | 2016 | 251   |
| 8   | Occurrence and Health Implication of Fluoride in Groundwater of Loess Aquifer in the Chinese Loess Plateau: A Case Study of Tongchuan, Northwest China                          | Li, Peiyue      | Expo. Health          | 2019 | 246   |
| 9   | Assessment of heavy metals contamination in sediments from three adjacent regions of the Yellow River using metal chemical fractions and multivariate analysis techniques       | Ma, Xiaoling    | Chemosphere           | 2016 | 239   |
| 10  | Spatiotemporal vegetation cover variations associated with climate change and ecological restoration in the Loess Plateau                                                       | Sun, Wenyi      | Agric. For. Meteorol. | 2015 | 235   |
| 11  | Loess Plateau storage of Northeastern Tibetan Plateau-derived Yellow River sediment                                                                                             | Nie, Junsheng   | Nat. Commun.          | 2015 | 225   |
| 12  | Quantifying the impact of climate variability and human activities on streamflow in the middle reaches of the Yellow River basin, China                                         | Zhao, Guangju   | J. Hydrol.            | 2014 | 217   |
| 13  | Effects on soil temperature, moisture, and maize yield of cultivation with ridge and furrow mulching in the rainfed area of the Loess Plateau, China                            | Li, Rong        | Agric. Water Manage.  | 2013 | 212   |
| 14  | Assessing the effects of land use and topography on soil erosion on the Loess Plateau in China                                                                                  | Sun, Wenyi      | Catena                | 2014 | 208   |
| 15  | Assessing regional virtual water flows and water footprints in the Yellow River Basin, China: A consumption based approach                                                      | Feng, Kuishuang | Appl. Geogr.          | 2012 | 198   |
| 16  | Arsenic and heavy metal pollution in wetland soils from tidal freshwater and salt marshes before and after the flow-sediment regulation regime in the Yellow River Delta, China | Bai, Junhong    | J. Hydrol.            | 2012 | 185   |
| 17  | Characteristics, sources, water quality and health risk assessment of trace elements in river water and well water in the Chinese Loess Plateau                                 | Xiao, Jun       | Sci. Total Environ.   | 2019 | 179   |
| 18  | Effects of different vegetation restoration on soil water storage and water balance in the Chinese Loess Plateau                                                                | Jian, Shengqi   | Agric. For. Meteorol. | 2015 | 176   |
| 19  | Evolution of the Yellow River Delta and its relationship with runoff and sediment load from 1983 to 2011                                                                        | Kong, Dongxian  | J. Hydrol.            | 2015 | 168   |
| 20  | Changes in extreme temperature and precipitation events in the Loess Plateau (China) during 1960-2013 under global warming                                                      | Sun, Wenyi      | Atmos. Res.           | 2016 | 157   |

|    |                                                                                                                                                                                               |                |                         |      |     |
|----|-----------------------------------------------------------------------------------------------------------------------------------------------------------------------------------------------|----------------|-------------------------|------|-----|
| 21 | Spatial groundwater quality and potential health risks due to nitrate ingestion through drinking water: A case study in Yan'an City on the Loess Plateau of northwest China                   | Li, Peiyue     | Hum. Ecol. Risk Assess. | 2019 | 150 |
| 22 | Risk assessment and source analysis of soil heavy metal pollution from lower reaches of Yellow River irrigation in China                                                                      | Zhang, Pengyan | Sci. Total Environ.     | 2018 | 147 |
| 23 | Hydrochemical characteristics and quality evaluation of groundwater in terms of health risks in Luohe aquifer in Wuyi County of the Chinese Loess Plateau, northwest China                    | He, Xiaodong   | Hum. Ecol. Risk Assess. | 2019 | 144 |
| 24 | Response of temporal variation of soil moisture to vegetation restoration in semi-arid Loess Plateau, China                                                                                   | Yang, Lei      | Catena                  | 2014 | 137 |
| 25 | Detecting and attributing vegetation changes on China's Loess Plateau                                                                                                                         | Li, Jingjing   | Agric. For. Meteorol.   | 2017 | 127 |
| 26 | Effects of precipitation and restoration vegetation on soil erosion in a semi-arid environment in the Loess Plateau, China                                                                    | Zhou, Ji       | Catena                  | 2016 | 125 |
| 27 | Use of biochar-compost to improve properties and productivity of the degraded coastal soil in the Yellow River Delta, China                                                                   | Luo, Xianxiang | J. Soils Sediments      | 2017 | 118 |
| 28 | Statistical and multivariate statistical techniques to trace the sources and affecting factors of groundwater pollution in a rapidly growing city on the Chinese Loess Plateau                | Wu, Jianhua    | Hum. Ecol. Risk Assess. | 2020 | 113 |
| 29 | Ecoenzymatic stoichiometry and microbial nutrient limitation in rhizosphere soil in the arid area of the northern Loess Plateau, China                                                        | Cui, Yongxing  | Soil Biol. Biochem.     | 2018 | 112 |
| 30 | Distribution and characteristics of landslide in Loess Plateau: A case study in Shaanxi province                                                                                              | Zhuang, Jianqi | Eng. Geol.              | 2018 | 111 |
| 31 | Comprehensive understanding of groundwater quality for domestic and agricultural purposes in terms of health risks in a coal mine area of the Ordos basin, north of the Chinese Loess Plateau | Wu, Jianhua    | Environ. Earth Sci.     | 2019 | 110 |
| 32 | Impacts of climate change and human activities on grassland vegetation variation in the Chinese Loess Plateau                                                                                 | Zheng, Kai     | Sci. Total Environ.     | 2019 | 106 |
| 33 | Surface Water Pollution in the Middle Chinese Loess Plateau with Special Focus on Hexavalent Chromium (Cr6+): Occurrence, Sources and Health Risks                                            | He, Xiaodong   | Expo. Health            | 2020 | 101 |
| 34 | A fluidized landslide occurred in the Loess Plateau: A study on loess landslide in South Jingyang tableland                                                                                   | Leng, Yanqiu   | Eng. Geol.              | 2018 | 93  |
| 35 | Distribution of microplastics in surface water of the lower Yellow River near estuary                                                                                                         | Han, Mei       | Sci. Total Environ.     | 2020 | 86  |
| 36 | Assessment of the sustainability of <i>Gymnocypris eckloni</i> habitat under river damming in the source region of the Yellow River                                                           | Quan, Quan     | Sci. Total Environ.     | 2021 | 37  |
| 37 | Biochar and effective microorganisms promote <i>Sesbania cannabina</i> growth and soil quality in the coastal saline-alkali soil of the Yellow River Delta, China                             | Cui, Qian      | Sci. Total Environ.     | 2021 | 31  |
| 38 | Quantitative contributions of climate change and human activities to vegetation changes over multiple time scales on the Loess Plateau                                                        | Shi, Shangyu   | Sci. Total Environ.     | 2021 | 31  |
| 39 | Coupling coordination degree of production, living and ecological spaces and its influencing factors in the Yellow River Basin                                                                | Li, Jiangsu    | J. Clean Prod.          | 2021 | 30  |
| 40 | Spatial-temporal dynamics of agricultural drought in the Loess Plateau under a changing environment: Characteristics and potential influencing factors                                        | Han, Zhiming   | Agric. Water Manage.    | 2021 | 23  |
| 41 | Land Use Transition and Driving Forces in Chinese Loess Plateau: A Case Study from Pu County, Shanxi Province                                                                                 | Huang, Han     | Land                    | 2021 | 16  |

**Supplementary Table S2. TOP 20 Highly cited scientific papers in the eco-environment research in the Yellow River Basin from CNKI (in English)**

| NO. | Title                                                                                                                | First Author     | Journal                                              | Year | Times |
|-----|----------------------------------------------------------------------------------------------------------------------|------------------|------------------------------------------------------|------|-------|
| 1   | The effect of land use change on the regional environment in the YangJuanGou catchment in the loess plateau of China | Fu, Bojie        | Acta Geographica Sinica                              | 1999 | 1145  |
| 2   | Analysis of impact of human activity on landscape structure in Yellow River Delta——A case study of Dongying Region   | Chen, Lixiang    | Acta Ecologica Sinica                                | 1996 | 893   |
| 3   | Quantitative Study on Spatial Variation of Soil Erosion in a Small Watershed in the Loess Hilly Region               | Jiang, Shanzhong | Journal of Soil Erosion and Soil Conservation        | 1996 | 670   |
| 4   | <i>Impacts of climate change and human activities on vegetation cover changes in the Loess Plateau</i>               | Xin, Baozhong    | Scientia Sinica (Terrae)                             | 2007 | 549   |
| 5   | Regional Ecological Risk Assessment of Wetland in the Huanghe River Delt                                             | Xu, Xuegong      | Acta Scientiarum Naturalium Universitatis Pekinensis | 2001 | 519   |
| 6   | Effects of forest on water circle on the Loess Plateau                                                               | Li, Yushan       | Journal of Natural Resources                         | 2001 | 470   |
| 7   | Process-based soil erosion and sediment yield model in a small basin in the Hiliy Loess Region                       | Cai, Guoqiang    | Acta Geographica Sinica                              | 1996 | 393   |
| 8   | Effects of land use and vegetation restoration on soil quality in a small catchment of the Loess Plateau             | Gong, Jie        | Chinese Journal of Applied Ecology                   | 2004 | 383   |
| 9   | Soil water resources and afforestation in Loess Plateau                                                              | Yang, Wenzhi     | Journal of Natural Resources                         | 2001 | 377   |
| 10  | Changes of pan evaporation in the recent 40 years over the Yellow River Basin                                        | Qiu, Mingfa      | Journal of Natural Resources                         | 2003 | 376   |
| 11  | Spatiotemporal variability of Soil Moisture in Small Catchment on Loess Plateau--Semivariograms                      | Wang, Jun        | Acta Geographica Sinica                              | 2000 | 376   |
| 12  | Effect of Vegetation Restoration on Soil Nutrient Changes in Zhifanggou Watershed of Loess Hilly Region              | Wang, Guoliang   | Bulletin of Soil and Water Conservation              | 2002 | 372   |
| 13  | Spatial Heterogeneity of Soil Nutrients in a Small Catchment of the Loess Plateau                                    | Wang, Jun        | Acta Ecologica Sinica                                | 2002 | 369   |
| 14  | Long-term trend of precipitation in the Yellow River basin during the past 50 years                                  | Xu, Zongxue      | Geographical Research                                | 2006 | 364   |
| 15  | Effect simulations of land use change on the runoff and erosion for a Gully Catchment of the Loess Plateau, China    | Fu, Bojie        | Acta Geographica Sinica                              | 2002 | 354   |
| 16  | Comparison of grain-size distribution of Red Clay and Loess-paleosol deposits in Chinese Loess Placat                | Lu, Huayu        | Acta Sedimentologica Sinica                          | 1999 | 321   |
| 17  | Landscape pattern of rural residential areas in Yellow River Delta in recent 20 years                                | Cai, Weimin      | Resources Science                                    | 2004 | 313   |
| 18  | <i>Influence of land use structure on soil nutrient distribution in loess hilly region</i>                           | Fu, Bojie        | Chinese Science Bulletin                             | 1998 | 313   |
| 19  | Soil ecological stoichiometry under different vegetation area on loess hilly-gully region                            | Zhu, Qiulian     | Acta Ecologica Sinica                                | 2013 | 305   |
| 20  | The study of salt-affected soils in the Yellow River Delta based on Remote Sensing                                   | Guan, Yunxiu     | National Remote Sensing Bulletin                     | 2001 | 298   |
